# Supplementary material for: Improved glucose recovery from durian peel by alkaline-catalyzed steam pretreatment
Source: PeerJ journal article supplement (doi:10.7717/peerj.12026), 2021-08-18

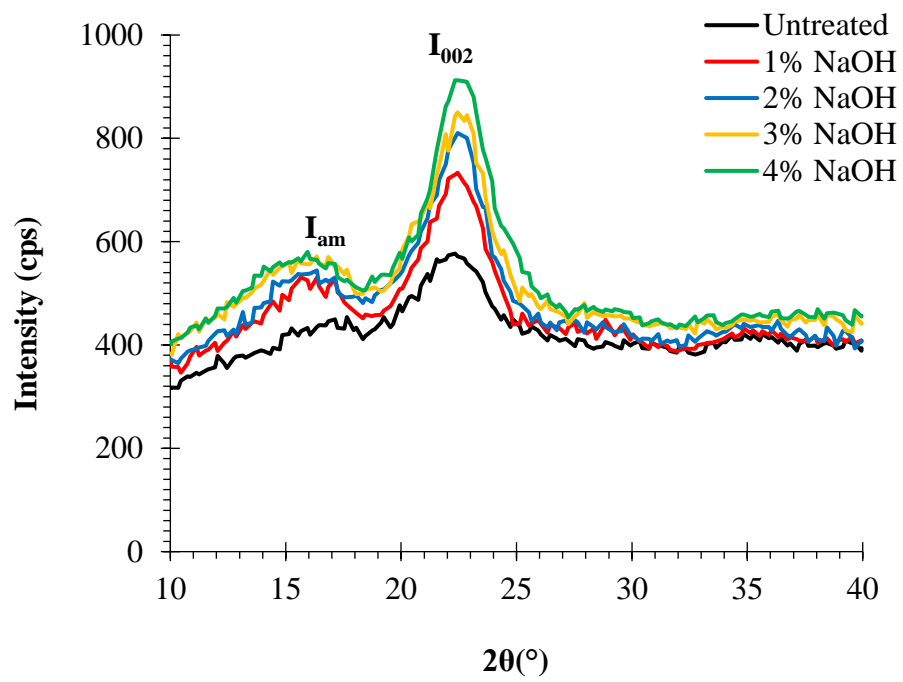

Supplement: Figure_S1.pdf [file Figure_S1.pdf]
