# Supplementary material for: Improved glucose recovery from durian peel by alkaline-catalyzed steam pretreatment
Source: PeerJ. 2021 Aug 18;9:e12026. doi: 10.7717/peerj.12026 (PMC8380032; doi:10.7717/peerj.12026)
Supplement: Supplemental Information 1 [file peerj-09-12026-s001.xlsx]

## Sheet: Chanee-concentration
Composition					Enzymatic hydrolysis					Delignification			Intensity (XRD)
Glucan	Xylan	Lignin	Concentration		HE	GR	GC	Treatment		%	Concentration		2θ	Untreated	1% NaOH	2% NaOH	3% NaOH	4% NaOH
41.81	12	14.76	Untreated		6.37	2.93	0.39	12 h untreated		60.13	1% NaOH		10.04	355.46	353.718	405.052	403.362	357.36
41.96	12.05	14.76			6.55	2.99	0.41			59.99			10.15	360.758	357.207	414.091	411.772	376.261
41.12	11.7	15.05			6.46	3.05	0.4			60.71			10.44	366.721	368.549	416.81	421.787	389.802
53.4	10.53	9.44	1% NaOH		38.06	14.77	3.07	12 h 1% NaOH		77.92	2% NaOH		10.55	367.259	368.081	414.992	430.299	384.72
53.33	10.63	9.4			38.05	15.05	3.01			77.5			10.84	379.623	379.817	430.371	426.109	395.153
53.85	10.29	9.14			38.67	14.91	3.13			77.98			10.95	369.516	377.007	435.872	447.941	404.866
56.71	9	5.81	2% NaOH		59	22	4.96	12 h 2% NaOH		84.33	3% NaOH		11.24	383.308	386.566	451.612	448.902	409.272
56.06	9.16	5.52			58.16	22.31	4.81			83.91			11.35	396.298	402.768	454.307	438.225	415.507
56.6	9	5.69			58.58	22.01	5.11			84.13			11.64	414.557	403.774	451.793	452.018	418.392
60.55	8.48	4.81	3% NaOH		60.71	20.49	5.54	12 h 3% NaOH		88.02	4% NaOH		11.75	401.115	409.4	468.067	461.744	411.051
60.05	8.27	5.06			61.34	20.25	5.35			87.91			12.04	394.631	399.926	465.091	464.252	423.724
60.12	8.51	4.9			61.01	20.01	5.64			87.69			12.15	415.548	410.4	455.445	461.523	438.438
62.18	7.46	4.24	4% NaOH		63.48	19.3	5.81	12 h 4% NaOH					12.44	403.141	430.021	460.577	459.361	430.798
62.68	7.3	4.32			64.28	18.76	6.13						12.55	410.196	424.046	481.319	465.466	456.012
62.07	7.31	4.44			63.88	19	5.97						12.84	440.113	426.63	480.765	471.777	456.313
					10.36	4.8	0.65	24 h untreated					12.95	421.315	429.487	491.173	477.401	441.356
					10.56	4.89	0.63						13.21	437.945	443.807	484.829	482.619	444.396
					10.46	4.8	0.67						13.44	440.791	429.713	506.22	501.651	460.697
					50.46	19.23	3.94	24 h 1% NaOH					13.55	446.694	436.69	525.206	490.878	476.591
					49.92	19.47	4.08						13.84	449.476	453.838	510.256	511.948	471.364
					49.59	19.7	4.01						13.95	455.051	458.557	531.428	511.904	490.583
					74.17	27.82	6.28	24 h 2% NaOH					14.24	464.211	454.676	533.943	497.077	484.497
					73.86	27.99	6.12						14.35	459.198	466.725	526.57	507.288	523.399
					74.48	28.16	6.44						14.63	471.721	462.302	527.558	502.871	521.156
					75.59	25.09	6.67	24 h 3% NaOH					14.75	462.401	462.354	532.764	530.029	526.336
					75.2	25.38	6.99						15.04	461.715	466.896	532.566	522.459	518.464
					75.98	24.8	6.83						15.15	484.466	473.512	548.811	532.749	542.354
					76.15	22.79	7.3	24 h 4% NaOH					15.44	463.438	465.317	531.48	513.704	546.818
					76.93	22.49	7						15.55	482.535	489.571	549.083	523.022	534.019
					76.54	23.09	7.15						15.84	465.111	473.613	545.089	536.575	556.441
					11.27	5.14	0.69	48 h untreated					15.95	466.505	493.972	542.347	533.054	529.367
					11.14	5.28	0.71						16.24	454.775	491.583	554.213	533.327	572.892
					11.4	5.21	0.7						16.35	436.166	490.929	524.561	536.342	551.01
					56.44	22.43	4.52	48 h 1% NaOH					16.64	449.592	495.762	542.026	536.08	539.629
					57.74	22.05	4.64						16.75	454.897	491.216	522.119	525.027	556.682
					57.09	22.24	4.58						17.04	454.903	497.003	535.478	542.391	568.364
					82.21	31.55	6.9	48 h 2% NaOH					17.15	450.884	485.305	521.946	549.594	532.636
					83.44	31.05	7.13						17.44	453.232	469.714	534.279	527.553	536.816
					82.81	31.15	7						17.55	426.202	478.04	498.075	528.881	541.521
					84.91	28.4	7.65	48 h 3% NaOH					17.84	426.105	468.228	502.127	526.47	515.664
					84.46	28.03	7.53						17.95	441.715	452.826	513.089	538.151	498.864
					84.01	27.66	7.71						18.24	425.233	447.935	510.435	516.634	487.007
					85.72	25.34	7.91	48 h 4% NaOH					18.35	424.05	439.946	514.918	508.565	510.221
					86.34	25.61	8.17						18.64	445.466	441.616	507.432	505.023	515.699
					86.03	25.91	8.04						18.75	436.768	444.897	505.659	507.729	509.868
					11.74	5.5	0.74	72 h untreated					19.04	435.585	443.329	490.054	495.73	503.293
					12.08	5.41	0.76						19.15	442.131	445.631	501.208	509.602	522.887
					11.91	5.59	0.72						19.44	432.803	460.072	521.808	515.956	528.924
					60.65	23.85	4.93	72 h 1% NaOH					19.55	446.204	475.882	533.528	539.757	547.411
					61.83	24.15	4.82						19.84	459.023	485.938	554.071	562.127	532.246
					61.24	23.55	5						19.95	481.369	501.892	553.634	577.768	567.36
					86.71	32.92	7.25	72 h 2% NaOH					20.16	467.218	494.101	563.774	575.28	569.648
					87.74	32.73	7.53						20.44	486.878	517.141	580.433	588.731	589.691
					87.21	33.11	7.39						20.55	496.688	528.969	586.525	590.954	606.078
					88.7	29.45	7.88	72 h 3% NaOH					20.75	526.352	534.837	612.568	617.941	644.757
					89.23	29.69	8.16						21.04	517.009	556.929	631.96	638.174	644.462
					88.2	29.21	8.02						21.15	524.029	563.326	648.491	655.519	681.742
					90.09	26.83	8.59	72 h 4% NaOH					21.35	547.263	574.612	667.768	672.055	690.532
					89.51	26.51	8.22						21.64	546.665	587.026	688.864	694.748	735.309
					90.67	27.15	8.45						21.75	556.917	592.927	683.234	698.18	750.775
													22.04	564.19	597.993	688.37	705.66	792.104
													22.15	551.033	600.768	710.954	738.634	806.169
													22.44	522.527	598.529	701.993	733.23	811.535
													22.55	534.843	591.542	720.478	728.576	819.105
													22.84	505.997	568.261	672.475	704.598	811.556
													22.95	500.375	550.921	678.25	693.359	801.907
													23.24	448.881	510.153	629.798	660.307	788.704
													23.35	442.185	498.256	605.705	631.309	759.406
													23.64	416.156	476.704	565.983	592.331	725.206
													23.75	440.769	472.005	580.045	563.998	697.261
													24.04	413.949	458.563	527.562	552.832	636.208
													24.15	418.765	451.453	525.324	537.094	618.502
													24.44	393.141	447.366	511.134	515.099	587.354
													24.55	381.494	443.166	510.324	519.52	572.009
													24.84	376.22	435.4	468.296	498.943	534.252
													24.95	380.862	426.822	462.723	508.57	529.093
													25.24	381.338	404.118	473.227	482.053	515.787
													25.35	374.112	417.873	459.262	477.502	515.301
													25.64	379.52	409.833	465.336	471.012	516.799
													25.75	379.975	427.401	432.91	461.492	513.53
													25.95	381.202	416.799	441.325	461.54	483.553
													26.24	383.059	431.888	456.29	466.121	487.517
													26.35	360.416	416.111	461.131	475.705	496.125
													26.64	370.975	408.681	473.53	470.371	504.899
													26.75	370.783	411.432	445.715	468.246	501.608
													26.76	374.798	414.992	427.982	469.128	498.601
													27.04	391.542	414.705	449.903	471.48	487.325
													27.15	367.828	413.78	452.304	454.713	477.434
													27.44	365.418	423.353	443.695	467.009	467.275
													27.55	372.409	423.339	440.357	469.724	491.103
													27.83	381.636	413.726	437.308	468.428	471.564
													27.95	371.105	417.284	447.694	436.187	482.871
													28.24	387.139	417.216	449.186	462.591	485.888
													28.35	374.868	419.81	448.454	447.916	471.478
													28.64	369.959	409.901	442.549	452.108	476.317
													28.75	364.563	423.881	436.474	459.217	479.192
													29.04	376.103	418.695	454.413	461.558	484.621
													29.15	371.399	420.54	440.74	468.252	464.493
													29.44	383.508	424.736	429.178	439.806	470.146
													29.55	384.27	400.783	434.617	460.524	471.908
													29.75	362.617	416.148	443.809	431.966	487.483
													30.04	369.184	413.267	424.409	450.55	451.529
													30.15	378.178	419.031	443.526	445.142	464.734
													30.44	351.368	409.231	415.713	458.751	481.638
													30.55	373.277	412.739	415.291	448.46	455.025
													30.84	365.495	399.114	416.024	425.429	458.258
													30.95	376.686	399.658	414.889	442.636	465.604
													31.15	363.017	401.465	419.827	422.014	440.581
													31.44	365.917	396.255	418.99	446.257	470.235
													31.55	360.371	386.74	430.239	420.404	456.354
													31.84	349.85	405.804	409.804	438.741	451.333
													31.95	361.706	413.539	415.247	415.462	456.42
													32.24	370.878	402.727	419.522	440.862	457.908
													32.35	363.073	400.649	414.911	426.956	450.573
													32.64	369.47	407.826	415.725	437.603	465.558
													32.75	371.997	397.84	408.26	450.723	459.499
													33.04	369.456	404.343	414.26	436.847	451.123
													33.15	368.899	398.397	420.641	442.29	463.162
													33.44	366.321	410.169	419.891	462.009	467.333
													33.55	366.381	415.785	419.726	451.927	469.643
													33.84	363.877	401.626	426.585	454.969	464.751
													33.95	368.588	414.678	422.554	461.861	468.192
													34.24	371.02	409.388	417.465	455.12	472.78
													34.35	372.733	411.335	424.683	463.621	477.457
													34.63	372.473	409.641	425.493	441.422	479.615
													34.75	373.444	407.951	422.778	464.147	476.979
													35.04	367.65	408.615	425.124	446.715	473.864
													35.15	379.503	411.582	428.955	450.686	478.011
													35.44	360.235	406.251	432.739	443.318	472.846
													35.55	376.698	394.563	431.986	452.119	470.074
													35.84	370.559	398.772	429.002	457.58	477.601
													35.95	363.417	404.794	429.555	416.208	449.804
													36.24	375.398	415.639	418.869	440.373	471.23
													36.35	358.541	414.718	427.582	447.506	474.283
													36.64	372.065	389.056	426.424	430.763	478.025
													36.75	360.132	393.475	412.922	430.639	476.587
													37.04	361.14	392.016	421.997	425.909	474.957
													37.15	360.099	396.486	422.999	432.199	459.244
													37.35	365.051	379.907	414.973	432.222	461.441
													37.64	351.696	398.007	418.489	437.073	480.979
													37.75	368.133	397.37	415.396	431.709	463.258
													38.04	353.879	379.59	423.64	430.28	446.7
													38.24	359.751	393.58	417.31	436.461	470.608
													38.35	363.448	397.822	419.895	415.55	453.776
													38.64	358.285	406.777	415.249	446.164	464.242
													38.75	351.983	394.388	425.064	427.906	466.713
													39.04	365.998	394.78	410.056	419.182	456.865
													39.15	361.276	396.197	427.304	447.782	472.086
													39.35	352.925	393.716	424.617	426.119	442.141
													39.56	362.007	374.221	427.053	420.334	462.84
													39.84	365.142	387.881	420.843	438.349	453.555
													39.95	368.531	398.701	417.127	457.646	475.845

## Sheet: Chanee-temperature
Composition					Enzymatic hydrolysis					Delignification			Intensity (XRD)
Glucan	Xylan	Lignin	Concentration		HE	GR	GC	Treatment		%	Temperature		2θ	Untreated	110 °C	120 °C	130 °C
41.81	12	15.37	Untreated		6.37	2.93	0.39	12 h Untreated		73.81	110 °C		10.04	355.46	379.385	405.052	404.004
41.96	12.05	15.2			6.55	2.99	0.41			74.07			10.15	360.758	385.649	414.091	401.063
41.12	11.7	15.61			6.46	3.05	0.4			74.45			10.44	366.721	392.679	416.81	407.669
54.56	9.74	5.98	110 °C		54.78	22.7	4.46	12 h 110 °C		77.5	120 °C		10.55	367.259	391.537	414.992	436.465
54.22	9.61	5.88			54.44	22.16	4.31			77.92			10.84	379.623	405.094	430.371	435.754
54.15	9.61	5.74			55.12	22.43	4.61			77.98			10.95	369.516	406.44	435.872	439.221
56.71	9	5.81	120 °C		59	22	4.96	12 h 120 °C		84.75	130 °C		11.24	383.308	419.089	451.612	430.179
56.06	9.16	5.52			58.16	22.31	4.81			85.15			11.35	396.298	428.538	454.307	428.716
56.6	9	5.69			58.58	22.01	5.11			85.57			11.64	414.557	427.784	451.793	446.606
60.75	5.92	5.32	130 °C		60.2	17.71	5.58	12 h 130 °C					11.75	401.115	438.733	468.067	466.381
60.02	6.11	5.04			60.82	18.11	5.36						12.04	394.631	432.509	465.091	464.934
60.13	6.04	5.14			60.51	17.91	5.47						12.15	415.548	432.923	455.445	471.371
					10.36	4.8	0.65	24 h Untreated					12.44	403.141	445.299	460.577	473.409
					10.56	4.89	0.63						12.55	410.196	452.683	481.319	488.916
					10.46	4.8	0.67						12.84	440.113	453.697	480.765	490.474
					72.1	29.53	5.76	24 h 110 °C					12.95	421.315	460.33	491.173	494.365
					72.51	29.24	5.98						13.21	437.945	464.318	484.829	498.104
					71.69	29.82	5.87						13.44	440.791	467.966	506.22	500.159
					74.17	27.82	6.28	24 h 120 °C					13.55	446.694	480.948	525.206	508.904
					73.86	27.99	6.12						13.84	449.476	482.047	510.256	519.821
					74.48	28.16	6.44						13.95	455.051	494.993	531.428	540.22
					77.09	22.5	7.07	24 h 130 °C					14.24	464.211	494.309	533.943	551.572
					76.52	23.12	6.97						14.35	459.198	496.648	526.57	548.716
					77.66	22.81	6.87						14.63	471.721	494.93	527.558	547.702
					11.27	5.14	0.69	48 h Untreated					14.75	462.401	497.559	532.764	559.509
					11.14	5.28	0.71						15.04	461.715	499.731	532.566	573.58
					11.4	5.21	0.7						15.15	484.466	511.162	548.811	557.271
					82.06	33.3	6.48	48 h 110 °C					15.44	463.438	498.399	531.48	566.34
					81.04	33.05	6.84						15.55	482.535	519.327	549.083	570.161
					81.55	33.85	6.6						15.84	465.111	509.351	545.089	566.88
					82.21	31.55	6.9	48 h 120 °C					15.95	466.505	518.159	542.347	580.981
					83.44	31.05	7.13						16.24	454.775	522.898	554.213	576.253
					82.81	31.15	7						16.35	436.166	507.745	524.561	566.045
					86.1	25.57	7.62	48 h 130 °C					16.64	449.592	518.894	542.026	564.948
					87.09	25.17	8						16.75	454.897	506.668	522.119	550.888
					86.01	25.97	7.81						17.04	454.903	516.24	535.478	557.789
					11.74	5.5	0.74	72 h Untreated					17.15	450.884	503.625	521.946	550.526
					12.08	5.41	0.76						17.44	453.232	501.996	534.279	532.918
					11.91	5.59	0.72						17.55	426.202	488.058	498.075	519.413
					85.43	35.09	6.9	72 h 110 °C					17.84	426.105	485.178	502.127	523.071
					86.43	35.39	7.1						17.95	441.715	482.958	513.089	519.618
					85.93	35.09	7.01						18.24	425.233	479.185	510.435	515.821
					86.71	32.61	7.25	72 h 120 °C					18.35	424.05	477.432	514.918	517.393
					87.74	33.09	7.53						18.64	445.466	474.524	507.432	520.361
					87.21	33.06	7.39						18.75	436.768	475.278	505.659	518.798
					90.05	26.74	8.17	72 h 130 °C					19.04	435.585	466.692	490.054	523.511
					90.89	26.41	8.06						19.15	442.131	473.419	501.208	526.245
					90.11	27.07	8.28						19.44	432.803	490.94	521.808	542.44
													19.55	446.204	504.705	533.528	563.584
													19.84	459.023	520.005	554.071	577.187
													19.95	481.369	527.763	553.634	602.564
													20.16	467.218	528.938	563.774	602.464
													20.44	486.878	548.787	580.433	619.211
													20.55	496.688	557.747	586.525	628.516
													20.75	526.352	573.702	612.568	661.349
													21.04	517.009	594.445	631.96	671.318
													21.15	524.029	605.909	648.491	698.63
													21.35	547.263	621.19	667.768	711.293
													21.64	546.665	637.945	688.864	735.029
													21.75	556.917	638.081	683.234	754.477
													22.04	564.19	643.182	688.37	768.882
													22.15	551.033	655.861	710.954	792.402
													22.44	522.527	650.261	701.993	802.383
													22.55	534.843	656.01	720.478	803.841
													22.84	505.997	620.368	672.475	778.077
													22.95	500.375	614.586	678.25	757.633
													23.24	448.881	569.976	629.798	734.505
													23.35	442.185	551.981	605.705	715.357
													23.64	416.156	521.343	565.983	678.769
													23.75	440.769	526.025	580.045	660.63
													24.04	413.949	493.062	527.562	594.52
													24.15	418.765	488.388	525.324	577.798
													24.44	393.141	479.25	511.134	551.226
													24.55	381.494	476.745	510.324	545.764
													24.84	376.22	451.848	468.296	516.597
													24.95	380.862	444.773	462.723	518.832
													25.24	381.338	438.673	473.227	498.92
													25.35	374.112	438.567	459.262	496.402
													25.64	379.52	437.585	465.336	493.905
													25.75	379.975	430.156	432.91	487.511
													25.95	381.202	429.062	441.325	472.547
													26.24	383.059	444.089	456.29	476.819
													26.35	360.416	438.621	461.131	485.915
													26.64	370.975	441.106	473.53	487.635
													26.75	370.783	428.573	445.715	484.927
													26.76	374.798	421.487	427.982	483.865
													27.04	391.542	432.304	449.903	479.403
													27.15	367.828	433.042	452.304	466.074
													27.44	365.418	433.524	443.695	467.142
													27.55	372.409	431.848	440.357	480.413
													27.83	381.636	425.517	437.308	469.996
													27.95	371.105	432.489	447.694	459.529
													28.24	387.139	433.201	449.186	474.24
													28.35	374.868	434.132	448.454	459.697
													28.64	369.959	426.225	442.549	464.212
													28.75	364.563	430.178	436.474	469.204
													29.04	376.103	436.554	454.413	473.089
													29.15	371.399	430.64	440.74	466.373
													29.44	383.508	426.957	429.178	454.976
													29.55	384.27	417.7	434.617	466.216
													29.75	362.617	429.979	443.809	459.725
													30.04	369.184	418.838	424.409	451.039
													30.15	378.178	431.279	443.526	454.938
													30.44	351.368	412.472	415.713	460.195
													30.55	373.277	414.015	415.291	451.742
													30.84	365.495	407.569	416.024	451.844
													30.95	376.686	407.274	414.889	454.12
													31.15	363.017	410.646	419.827	451.298
													31.44	365.917	407.623	418.99	458.246
													31.55	360.371	408.49	430.239	448.379
													31.84	349.85	407.804	409.804	445.037
													31.95	361.706	414.393	415.247	445.941
													32.24	370.878	411.125	419.522	449.385
													32.35	363.073	407.78	414.911	448.764
													32.64	369.47	411.776	415.725	451.581
													32.75	371.997	403.05	408.26	455.111
													33.04	369.456	409.302	414.26	453.985
													33.15	368.899	409.519	420.641	452.726
													33.44	366.321	415.03	419.891	444.671
													33.55	366.381	417.755	419.726	440.785
													33.84	363.877	414.106	426.585	449.86
													33.95	368.588	418.616	422.554	445.026
													34.24	371.02	413.426	417.465	443.95
													34.35	372.733	418.009	424.683	440.539
													34.63	372.473	417.567	425.493	440.519
													34.75	373.444	415.365	422.778	440.563
													35.04	367.65	416.87	425.124	438.289
													35.15	379.503	420.269	428.955	434.349
													35.44	360.235	419.495	432.739	438.082
													35.55	376.698	413.274	431.986	441.096
													35.84	370.559	413.887	429.002	437.591
													35.95	363.417	417.174	429.555	443.006
													36.24	375.398	417.254	418.869	435.801
													36.35	358.541	421.15	427.582	430.894
													36.64	372.065	407.74	426.424	434.394
													36.75	360.132	403.199	412.922	433.613
													37.04	361.14	407.007	421.997	430.433
													37.15	360.099	409.743	422.999	435.721
													37.35	365.051	397.44	414.973	436.832
													37.64	351.696	408.248	418.489	429.026
													37.75	368.133	406.383	415.396	427.483
													38.04	353.879	401.615	423.64	428.49
													38.24	359.751	405.445	417.31	423.534
													38.35	363.448	408.858	419.895	424.663
													38.64	358.285	411.013	415.249	421.203
													38.75	351.983	409.726	425.064	427.31
													39.04	365.998	402.418	410.056	428.024
													39.15	361.276	411.75	427.304	429.934
													39.35	352.925	409.167	424.617	434.13
													39.56	362.007	400.637	427.053	431.587
													39.84	365.142	404.362	420.843	425.952
													39.95	368.531	407.914	417.127	426.745
