# Supplementary material for: Improved glucose recovery from durian peel by alkaline-catalyzed steam pretreatment
Source: PeerJ. 2021 Aug 18;9:e12026. doi: 10.7717/peerj.12026 (PMC8380032; doi:10.7717/peerj.12026)
Supplement: Supplemental Information 2 [file peerj-09-12026-s002.xlsx]

## Sheet: Monthong-concentration
Composition					Enzymatic hydrolysis					Delignification			Intensity (XRD)
Glucan	Xylan	Lignin	Concentration		HE	GR	GC	Treatment		%	Concentration		2θ	Untreated	1% NaOH	2% NaOH	3% NaOH	4% NaOH
43.75	12.11	14.76	Untreated		5.11	2.51	0.33	12 h untreated		61.96	1% NaOH		10.03	316.474	369.072	372.247	381.705	402.442
43.03	12.15	14.76			5.31	2.42	0.39			62.81			10.05	317.937	357.797	371.27	380.998	406.797
43.52	11.88	15.05			5.21	2.6	0.3			62.09			10.34	316.997	357.057	364.889	420.923	412.527
56.47	10.48	8.92	1% NaOH		37	14.56	3.08	12 h 1% NaOH		80.53	2% NaOH		10.45	330.695	346.422	373.667	412.477	413.891
56.25	10.26	8.79			37.45	15	3.23			80.97			10.74	339.561	364.355	387.284	424.876	423.541
56.14	10.43	8.69			37	14.78	3.11			80.98			10.85	338.168	377.376	389.557	425.946	433.335
59.72	8.18	4.92	2% NaOH		56.94	22.06	4.95	12 h 2% NaOH		85.98	3% NaOH		11.14	346.084	396.193	392.535	443.654	437.675
58.59	8.34	4.7			56.57	22.46	5.13			85.74			11.25	343.151	379.359	395.134	425.754	430.357
59.06	8.31	4.73			57.3	22.26	5.07			85.39			11.54	350.321	388.646	398.44	451.772	451.774
62.49	7.75	4.2	3% NaOH		58.17	19.54	5.4	12 h 3% NaOH		88.33	4% NaOH		11.65	352.999	391.064	408.007	446.226	442.562
61.54	7.89	4.44			58.87	19.91	5.55			88.98			11.94	356.966	404.326	421.9	452.817	456.303
62.8	7.68	4.42			58.37	19.7	5.43			88.95			12.05	379.316	388.487	426.752	460.346	470.909
64.11	7.13	4.02	4% NaOH		58.29	17.71	5.6	12 h 4% NaOH					12.34	364.229	404.695	428.504	449.363	470.575
64.66	7.22	3.94			59.09	17.95	5.74						12.45	355.573	407.873	417.527	483.343	473.341
64.52	7.11	3.84			58.69	17.83	5.67						12.74	373.215	426.478	429.852	473.846	490.967
					8.93	4.2	0.58	24 h untreated					12.85	378.081	416.27	420.495	477.898	482.08
					8.81	4.4	0.51						13.14	379.481	438.572	463.908	491.284	504.874
					9.05	4.3	0.65						13.25	375.266	431.156	439.149	490.903	505.389
					47.92	19.02	4.01	24 h 1% NaOH					13.54	382.051	443.716	443.662	502.483	511.175
					49.02	19.62	4.15						13.65	384.61	445.622	471.948	509.685	534.584
					48.02	19.02	4.08						13.94	389.627	441.597	472.725	516.568	533.967
					73.12	28.51	6.51	24 h 2% NaOH					14.05	388.05	458.376	481.465	524.244	551.649
					74.22	29.12	6.49						14.34	382.7	477.209	484.289	546.148	542.518
					73.82	28.8	6.62						14.45	394.612	484.297	522.894	535.96	550.676
					75.53	25.44	7	24 h 3% NaOH					14.74	391.335	466.061	514.501	549.305	560.165
					76.33	25.84	7.18						14.85	419.411	497.249	523.343	551.737	553.487
					76.23	25.64	7.12						15.14	421.288	486.665	522.599	560.618	560.408
					75.33	22.56	7.2	24 h 4% NaOH					15.25	432.098	509.171	525.462	539.596	559.553
					74.43	23.02	7.34						15.54	418.263	523.899	537.671	565.47	568.061
					75.33	22.79	7.21						15.65	426.535	530.699	536.383	558.021	561.684
					11.43	5.64	0.66	48 h untreated					15.94	432.984	525.408	537.43	555.899	580.322
					11.69	5.57	0.8						16.05	419.641	508.347	538.199	556.554	566.706
					11.56	5.5	0.79						16.34	434.938	530.425	544.573	571.692	564.936
					59.56	23.47	5.01	48 h 1% NaOH					16.45	438.328	513.883	518.114	558.221	557.712
					59.96	24.07	5.13						16.74	438.122	493.188	526.558	553.994	548.291
					59.76	23.77	5.01						16.85	446.072	512.854	522.267	570.229	558.479
					84.95	33.18	7.43	48 h 2% NaOH					17.14	449.415	526.855	530.68	550.457	556.843
					84.57	33.42	7.61						17.25	432.953	506.575	501.777	552.174	531.117
					85.33	33	7.55						17.54	431.772	482.203	492.504	537.051	523.627
					86.83	29.1	8.11	48 h 3% NaOH					17.65	453.724	477.399	492.516	545.709	526.706
					86.4	29.48	8.02						17.94	428.883	466.515	493.683	507.207	515.173
					87.29	29.29	8.2						18.05	433.376	461.816	495.962	498.279	511.707
					85.9	26.22	8.24	48 h 4% NaOH					18.34	411.511	451.589	481.268	498.951	505.262
					86.5	26.03	8.44						18.45	417.628	459.052	490.435	507.224	506.416
					86.5	26.41	8.34						18.74	428.091	456.039	482.778	509.621	532.391
					12.65	6.06	0.79	72 h untreated					18.85	430.355	457.63	496.311	511.328	522.077
					12.8	6.28	0.9						19.14	443.533	458.403	506.428	503.547	535.662
					12.95	6.17	0.8						19.25	453.897	466.597	506.993	505.587	536.105
					62.11	24.67	5.18	72 h 1% NaOH					19.54	434.064	474.951	518.836	519.495	534.872
					62.91	25.05	5.36						19.65	440.472	483.526	522.597	534.47	549.777
					62.51	24.86	5.3						19.94	476.605	508.452	535.618	548.765	578.186
					89.04	34.52	7.92	72 h 2% NaOH					20.05	465.315	509.338	542.605	585.451	566.801
					89.64	35.32	7.82						20.34	492.424	535.804	573.314	609.994	608.405
					89.34	34.92	8.02						20.45	494.878	549.573	582.063	633.733	601.057
					90.45	30.35	8.39	72 h 3% NaOH					20.74	487.717	565.559	597.58	639.454	613.269
					91.05	30.93	8.59						20.85	514.633	586.843	619.612	645.569	654.06
					91.05	30.64	8.49						21.14	537.345	600.746	645.524	675.892	683.73
					90.39	27.93	8.78	72 h 4% NaOH					21.25	523.786	638.026	672.03	664.65	700.925
					91.14	27.6	8.7						21.54	566.199	644.796	689.889	729.862	777.867
					91.14	27.3	8.86						21.65	561.063	669.239	719.951	745.657	799.291
													21.94	565.509	692.176	749.804	808.582	862.298
													22.05	573.38	722.277	777.811	776.123	871.502
													22.34	576.979	729.51	801.509	843.718	912.554
													22.45	571.618	733.46	810.352	850.425	912.306
													22.74	567.42	713.753	803.355	833.807	910.501
													22.85	558.106	707.603	800.865	845.062	909.19
													23.14	546.01	677.156	752.889	809.021	880.383
													23.25	542.409	668.722	701.958	751.896	850.204
													23.54	521.647	626.461	667.337	732.226	777.968
													23.65	502.234	586.119	666.55	686.5	762.721
													23.94	475.307	560.49	572.477	620.437	717.197
													24.05	470.039	543.728	569.716	604.878	664.536
													24.34	449.118	512.051	546.772	575.748	630.429
													24.45	457.597	497.846	524.382	583.498	626.074
													24.74	434.755	464.915	502.784	535.554	604.524
													24.85	449.839	439.485	485.385	522.912	596.397
													25.14	435.907	440.921	480.196	484.965	568.522
													25.25	421.867	461.037	475.822	510.668	541.255
													25.54	425.983	436.944	463.155	494.167	539.126
													25.65	436.28	441.653	445.989	498.429	513.615
													25.94	428.026	448.238	460.614	473.788	501.911
													26.05	420.536	441.14	443.19	469.711	490.585
													26.34	408.994	423.881	433.798	486.035	498.124
													26.45	419.002	438.974	443.18	469.547	483.131
													26.74	412.597	434.728	428.594	465.138	472.512
													26.85	408.184	432.813	443.838	462.556	478.64
													27.14	411.836	421.447	447.117	455.165	463.848
													27.25	407.933	434.171	440.824	440.521	453.314
													27.54	397.636	442.477	447.929	455.662	469.27
													27.65	411.148	425.734	444.182	459.551	468.203
													27.94	409.046	430.552	423.329	481.515	477.494
													28.05	398.599	422.376	444.31	452.63	465.697
													28.34	392.36	431.457	434.707	463.621	474.056
													28.45	394.942	411.787	430.012	460.488	468.869
													28.74	396.822	433.193	443.982	455.732	463.788
													28.85	405.6	448.988	435.039	458.11	468.623
													29.14	401.445	427.655	426.667	456.424	465.322
													29.25	398.034	418.893	425.789	454.951	469.221
													29.54	393.479	436.671	426.624	456.647	466.175
													29.65	409.229	429.367	440.484	451.21	464.062
													29.94	399.023	410.082	420.082	451.742	462.43
													30.05	402.422	420.709	417.323	447.966	451.898
													30.34	407.541	405.973	408.102	443.217	453.308
													30.45	394.143	404.994	412.3	441.096	437.925
													30.74	392.591	394.176	412.15	436.041	442.01
													30.85	404.693	405.847	407.329	437.564	445.775
													31.14	398.054	395.829	420.944	440.695	449.507
													31.25	398.203	402.863	402.516	441.315	443.829
													31.54	394.454	398.39	408.798	438.875	439.408
													31.65	388.349	390.359	405.439	432.727	440.091
													31.94	385.058	388.036	409.112	433.735	433.048
													32.05	396.373	389.707	396.111	433.598	439.559
													32.34	392.531	394.122	400.091	431.164	436.606
													32.45	385.482	392.589	418.821	440.126	441.608
													32.74	381.303	392.947	406.471	422.622	455.07
													32.85	382.857	400.299	412.121	446.29	444.163
													33.14	387.218	402.17	422.554	441.583	452.345
													33.25	402.205	403.528	426.828	450.503	457.106
													33.54	404.524	404.854	421.521	438.011	457.803
													33.65	394.814	406.614	418.151	430.412	444.301
													33.94	406.791	411.267	425.418	435.105	438.518
													34.05	405.019	414.312	425.789	432.424	442.112
													34.34	418.831	422.543	435.839	438.454	446.115
													34.45	409.761	414.456	439.456	445.276	450.064
													34.74	410.352	421.614	432.424	448.112	458.768
													34.85	421.412	432.516	440.958	448.737	458.761
													35.14	411.676	423.166	434.722	447.18	454.666
													35.25	419.136	428.691	435.816	449.452	455.464
													35.54	408.57	417.609	438.285	443.155	460.334
													35.65	421.449	426.418	435.05	443.767	456.505
													35.94	413.293	419.161	434.493	444.887	454.099
													36.05	415.66	428.405	427.558	454.501	464.305
													36.34	404.567	415.682	447.176	459.46	466.459
													36.45	413.225	421.826	431.841	448.53	452.343
													36.74	399.089	410.412	418.957	435.241	451.063
													36.85	403.145	414.963	415.406	447.617	453.609
													37.14	388.788	411.201	427.267	451.459	464.881
													37.25	402.04	407.945	430.67	457.383	465.831
													37.54	410.27	408.26	419.547	443.217	458.234
													37.65	398.217	407.113	406.494	448.586	454.722
													37.94	398.8	417.146	417.978	448.1	453.193
													38.05	395.995	404.61	410.548	457.925	469.446
													38.34	403.477	410.641	407.498	437.813	450.657
													38.45	403.961	413.015	434.324	458.042	461.426
													38.74	398.871	398.753	417.677	455.159	462.819
													38.85	392.927	407.442	398.209	449.347	461.422
													39.14	396.404	411.292	427.345	440.831	457.502
													39.25	408.875	405.695	427.238	428.84	448.704
													39.54	403.211	415.416	413.91	424.849	439.213
													39.65	403.083	403.199	393.543	457.246	467.368
													39.94	389.025	409.009	408.939	441.076	455.173
													39.95	393.846	408.335	406.064	442.784	456.542

## Sheet: Monthong-temperature
Composition					Enzymatic hydrolysis					Delignification			Intensity (XRD)
Glucan	Xylan	Lignin	Concentration		HE	GR	GC	Treatment		%	Temperature		2θ	Untreated	110 °C	120 °C	130 °C
43.75	12.11	14.76	Untreated		5.11	2.51	0.33	12 h Untreated		76.55	110 °C		10.03	316.474	344.361	372.247	392.073
43.03	12.15	14.76			5.31	2.42	0.39			76.94			10.05	317.937	344.603	371.27	393.898
43.52	11.88	15.05			5.21	2.6	0.3			77.25			10.34	316.997	340.943	364.889	416.725
55.55	9.56	5.16	110 °C		54.67	22.63	4.43	12 h 110 °C		80.53	120 °C		10.45	330.695	352.181	373.667	413.184
55.16	9.75	5.02			55.27	23.01	4.69			80.97			10.74	339.561	363.423	387.284	424.208
55.1	9.81	5.03			54.97	22.82	4.56			80.98			10.85	338.168	363.863	389.557	429.64
59.72	8.18	4.92	120 °C		56.94	22.06	4.95	12 h 120 °C		85.54	130 °C		11.14	346.084	369.31	392.535	440.664
58.59	8.34	4.7			56.57	22.46	5.13			86.19			11.25	343.151	369.143	395.134	428.056
59.06	8.31	4.73			57.3	22.26	5.07			85.83			11.54	350.321	374.38	398.44	451.773
62.29	6.53	4.59	130 °C		58.01	18.51	5.31	12 h 130 °C					11.65	352.999	380.503	408.007	444.394
61.14	6.42	4.35			58.47	18.71	5.53						11.94	356.966	389.433	421.9	454.56
62.9	6.11	4.66			58.24	18.61	5.42						12.05	379.316	403.034	426.752	465.627
					8.93	4.2	0.58	24 h Untreated					12.34	364.229	396.366	428.504	459.969
					8.81	4.4	0.51						12.45	355.573	386.55	417.527	478.342
					9.05	4.3	0.65						12.74	373.215	401.534	429.852	482.406
					72.68	30.08	6.01	24 h 110 °C					12.85	378.081	399.288	420.495	479.989
					73.68	30.66	6.19						13.14	379.481	421.695	463.908	498.079
					73.18	30.37	6						13.25	375.266	407.207	439.149	498.146
					73.12	28.51	6.51	24 h 120 °C					13.54	382.051	412.856	443.662	506.829
					74.22	29.12	6.49						13.65	384.61	428.279	471.948	522.135
					73.82	28.8	6.62						13.94	389.627	431.176	472.725	525.267
					75.34	24	6.92	24 h 130 °C					14.05	388.05	434.758	481.465	537.947
					75.68	24.21	7.02						14.34	382.7	433.495	484.289	544.333
					75	24	7.12						14.45	394.612	458.753	522.894	543.318
					11.43	5.64	0.66	48 h Untreated					14.74	391.335	452.918	514.501	554.735
					11.69	5.57	0.8						14.85	419.411	471.377	523.343	552.612
					11.56	5.5	0.79						15.14	421.288	471.944	522.599	560.513
					83.67	34.43	6.94	48 h 110 °C					15.25	432.098	478.78	525.462	549.574
					83.26	35.03	6.86						15.54	418.263	477.967	537.671	566.765
					84.08	34.73	7.02						15.65	426.535	481.459	536.383	559.852
					84.95	33.18	7.43	48 h 120 °C					15.94	432.984	485.207	537.43	568.111
					84.57	33.42	7.61						16.05	419.641	478.92	538.199	561.63
					85.33	33	7.55						16.34	434.938	489.755	544.573	568.314
					86.51	27.42	8.01	48 h 130 °C					16.45	438.328	478.221	518.114	557.966
					86.11	27.86	8.16						16.74	438.122	482.34	526.558	551.143
					86.91	27.64	8.01						16.85	446.072	484.17	522.267	564.354
					12.65	6.06	0.79	72 h Untreated					17.14	449.415	490.048	530.68	553.65
					12.8	6.28	0.9						17.25	432.953	467.365	501.777	541.645
					12.95	6.17	0.8						17.54	431.772	462.138	492.504	530.339
					87.47	36.43	7.16	72 h 110 °C					17.65	453.724	473.12	492.516	536.207
					88.09	36.12	7.4						17.94	428.883	461.283	493.683	511.19
					87.78	36.74	7.28						18.05	433.376	464.669	495.962	504.993
					89.04	34.52	7.92	72 h 120 °C					18.34	411.511	446.389	481.268	502.106
					89.64	35.32	7.82						18.45	417.628	454.031	490.435	506.82
					89.34	34.92	8.02						18.74	428.091	455.435	482.778	521.006
					90.6	28.62	8.46	72 h 130 °C					18.85	430.355	463.333	496.311	516.702
					91.02	29.22	8.57						19.14	443.533	474.981	506.428	519.605
					90.8	29.22	8.35						19.25	453.897	480.445	506.993	520.846
													19.54	434.064	476.45	518.836	527.183
													19.65	440.472	481.534	522.597	542.124
													19.94	476.605	506.112	535.618	563.476
													20.05	465.315	503.96	542.605	576.126
													20.34	492.424	532.869	573.314	609.199
													20.45	494.878	538.471	582.063	617.395
													20.74	487.717	542.649	597.58	626.361
													20.85	514.633	567.122	619.612	649.814
													21.14	537.345	591.435	645.524	679.811
													21.25	523.786	597.908	672.03	682.787
													21.54	566.199	628.044	689.889	753.864
													21.65	561.063	640.507	719.951	772.474
													21.94	565.509	657.657	749.804	835.44
													22.05	573.38	675.596	777.811	823.812
													22.34	576.979	689.244	801.509	878.136
													22.45	571.618	690.985	810.352	881.365
													22.74	567.42	685.388	803.355	872.154
													22.85	558.106	679.486	800.865	877.126
													23.14	546.01	649.449	752.889	844.702
													23.25	542.409	622.183	701.958	801.05
													23.54	521.647	594.492	667.337	755.097
													23.65	502.234	584.392	666.55	724.611
													23.94	475.307	523.892	572.477	668.817
													24.05	470.039	519.878	569.716	634.707
													24.34	449.118	497.945	546.772	603.089
													24.45	457.597	490.989	524.382	604.786
													24.74	434.755	468.769	502.784	570.039
													24.85	449.839	467.612	485.385	559.655
													25.14	435.907	458.052	480.196	526.744
													25.25	421.867	448.845	475.822	525.962
													25.54	425.983	444.569	463.155	516.646
													25.65	436.28	441.135	445.989	506.022
													25.94	428.026	444.32	460.614	487.85
													26.05	420.536	431.863	443.19	480.148
													26.34	408.994	421.396	433.798	492.08
													26.45	419.002	431.091	443.18	476.339
													26.74	412.597	420.596	428.594	468.825
													26.85	408.184	426.011	443.838	470.598
													27.14	411.836	429.476	447.117	459.507
													27.25	407.933	424.379	440.824	446.918
													27.54	397.636	422.783	447.929	462.466
													27.65	411.148	427.665	444.182	463.877
													27.94	409.046	416.188	423.329	479.505
													28.05	398.599	421.454	444.31	459.163
													28.34	392.36	413.534	434.707	468.838
													28.45	394.942	412.477	430.012	464.678
													28.74	396.822	420.402	443.982	459.76
													28.85	405.6	420.32	435.039	463.366
													29.14	401.445	414.056	426.667	460.873
													29.25	398.034	411.911	425.789	462.086
													29.54	393.479	410.052	426.624	461.411
													29.65	409.229	424.856	440.484	457.636
													29.94	399.023	409.553	420.082	457.086
													30.05	402.422	409.873	417.323	449.932
													30.34	407.541	407.822	408.102	448.262
													30.45	394.143	403.221	412.3	439.51
													30.74	392.591	402.37	412.15	439.025
													30.85	404.693	406.011	407.329	441.669
													31.14	398.054	409.499	420.944	445.101
													31.25	398.203	400.36	402.516	442.572
													31.54	394.454	401.626	408.798	439.142
													31.65	388.349	396.894	405.439	436.409
													31.94	385.058	397.085	409.112	433.392
													32.05	396.373	396.242	396.111	436.579
													32.34	392.531	396.311	400.091	433.885
													32.45	385.482	402.152	418.821	440.867
													32.74	381.303	393.887	406.471	438.846
													32.85	382.857	397.489	412.121	445.226
													33.14	387.218	404.886	422.554	446.964
													33.25	402.205	414.516	426.828	453.804
													33.54	404.524	413.023	421.521	447.907
													33.65	394.814	406.483	418.151	437.356
													33.94	406.791	416.105	425.418	436.812
													34.05	405.019	415.404	425.789	437.268
													34.34	418.831	427.335	435.839	442.284
													34.45	409.761	424.609	439.456	447.67
													34.74	410.352	421.388	432.424	453.44
													34.85	421.412	431.185	440.958	453.749
													35.14	411.676	423.199	434.722	450.923
													35.25	419.136	427.476	435.816	452.458
													35.54	408.57	423.428	438.285	451.745
													35.65	421.449	428.25	435.05	450.136
													35.94	413.293	423.893	434.493	449.493
													36.05	415.66	421.609	427.558	459.403
													36.34	404.567	425.871	447.176	462.959
													36.45	413.225	422.533	431.841	450.437
													36.74	399.089	409.023	418.957	443.152
													36.85	403.145	409.275	415.406	450.613
													37.14	388.788	408.028	427.267	458.17
													37.25	402.04	416.355	430.67	461.607
													37.54	410.27	414.909	419.547	450.726
													37.65	398.217	402.356	406.494	451.654
													37.94	398.8	408.389	417.978	450.647
													38.05	395.995	403.272	410.548	463.686
													38.34	403.477	405.487	407.498	444.235
													38.45	403.961	419.143	434.324	459.734
													38.74	398.871	408.274	417.677	458.989
													38.85	392.927	395.568	398.209	455.385
													39.14	396.404	411.875	427.345	449.167
													39.25	408.875	418.057	427.238	438.772
													39.54	403.211	408.561	413.91	432.031
													39.65	403.083	398.313	393.543	462.307
													39.94	389.025	398.982	408.939	448.125
													39.95	393.846	399.955	406.064	449.663
